# Supplementary material for: Bidirectional variation in glutamate efflux in the medial prefrontal cortex induced by selective positive and negative allosteric mGluR5 modulators
Source: PubMed Central journal article supplement (PMC5972455; doi:10.1111/jnc.14290), 2018-02-12
Supplement: JNC-145-111-s002.pdf [file JNC-145-111-s002.pdf]

Supplementary Figure 1.

Exp. 1: Effect of MK801 on glutamate efflux

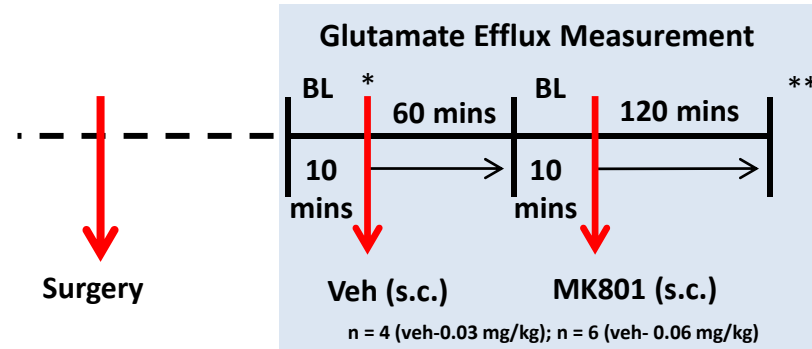

\* 2 animals excluded (TF) \*\* 2 animals excluded (PP)

Exp. 2i: Effects of ADX47273 on glutamate efflux:

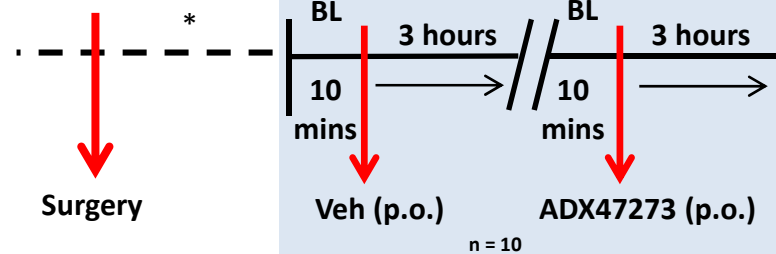

\* 1 animal excluded (HC)

Exp. 2ii: Effects of RO4917523 on glutamate efflux:

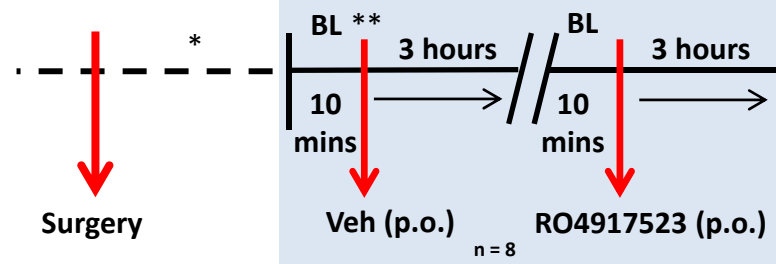

\* 2 animals excluded (HC) \*\* 1 animal excluded (TF)

Exp. 3: Interactive effects of MK801 and ADX47273 on glutamate efflux

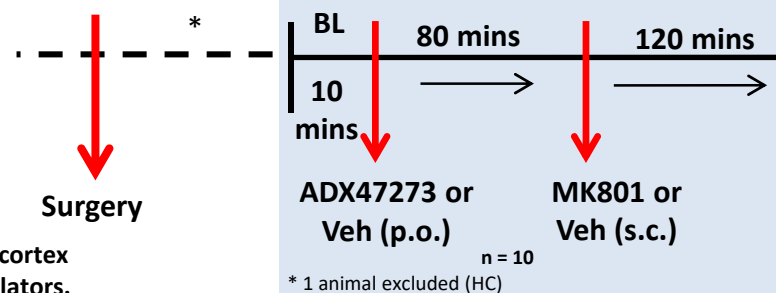

\* 1 animal excluded (HC)

**Bidirectional variation in glutamate efflux in the medial prefrontal cortex induced by selective positive and negative allosteric mGluR5 modulators.**

Sarah N. Isherwood, Trevor W. Robbins, Jeffrey W. Dalley, Anton Pekcec

Schematic diagram illustrating the experimental timeline for each experiment; n numbers represent the total number of rats used in each experiment (i.e. before exclusion); exclusion reason included: *TF*, technical fault; *PP*, incorrect probe placement; *HC*, lost head cap.

Supplementary Figure 2.

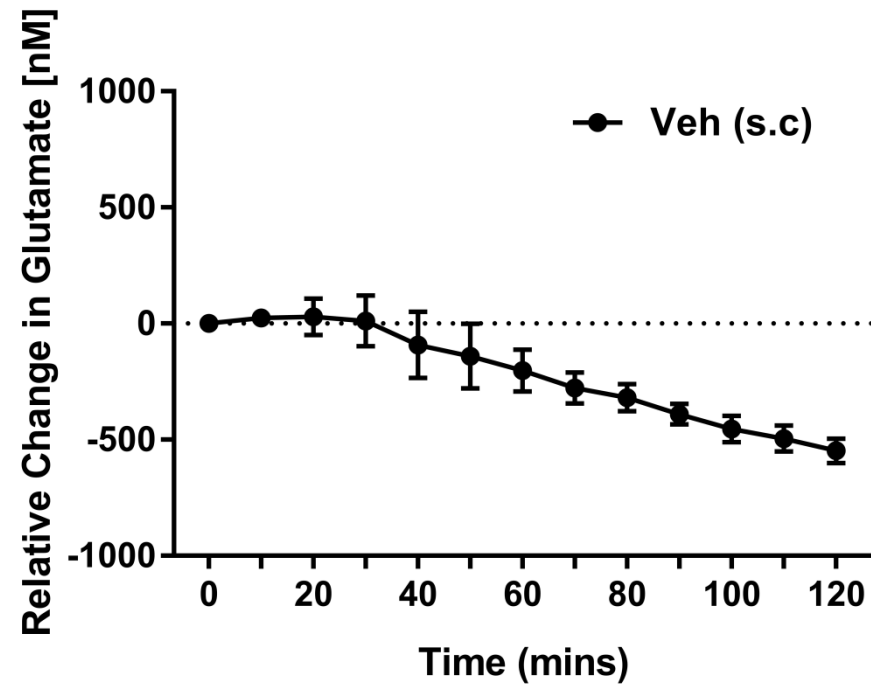

Effect of vehicle treatment on glutamate efflux in the mPFC. Rats received vehicle (s.c) 80 minutes into experiment 3 (n = 10 rats). Data points represent mean  $\pm$  SEM.
